# Supplementary material for: Long-term Monitoring of a Brown Trout (Salmo Trutta) Population Reveals Kin-associated Migration Patterns and Contributions by Resident Trout to the Anadromous Run
Source: Research Square preprint supplement (doi:10.21203/rs.3.rs-477846/v1), 2021-05-05

## Appendices

**Appendix 1.** Polymerase Chain Reaction conditions. **A:** PCR mixes used for the three microsatellite loci multiplexes. Exon 2 and Exon 4 stand for the gender marker primers. Reaction mixes were made in order to get 10µL per well. **B:** PCR programs used for the three multiplexes.

| A                 |               |    |                   |               |    |                   |               |    |
|-------------------|---------------|----|-------------------|---------------|----|-------------------|---------------|----|
| Multiplex 1       | Concentration |    | Multiplex 2       | Concentration |    | Multiplex 3       | Concentration |    |
| DNA               | ca 33         | ng | DNA               | ca 33         | ng | DNA               | ca 33         | ng |
| Buffer            | 1             | x  | Buffer            | 1             | x  | Buffer            | 1             | x  |
| MgCl <sub>2</sub> | 2             | mM | MgCl <sub>2</sub> | 2             | mM | MgCl <sub>2</sub> | 3             | mM |
| dNTP              | 0.2           | mM | dNTP              | 0.2           | mM | dNTP              | 0.2           | mM |
| GoTaq pol         | 0.5           | U  | GoTaq pol         | 0.5           | 1U | GoTaq pol         | 0.5           | 1U |
| Ssa85             | 0.2           | mM | BG935488          | 0.2           | mM | Ssa85             | 0.125         | mM |
| mOne102a_b        | 0.4           | mM | SsaD71            | 0.5           | mM | SsOsl417          | 0.2           | mM |
| Str2QUB           | 0.4           | mM | Sasa-TAP2A        | 0.6           | mM | Ssa87NVH          | 0.15          | mM |
| Ssa416UoS         | 0.4           | mM | MHC-I             | 0.3           | mM | Ssa24NVH          | 0.3           | mM |
| mOne101           | 0.4           | mM | Ssa410UoS         | 0.7           | mM | BS-131            | 0.3           | mM |
| Cocl-Lav-4        | 0.4           | mM | Str3QUB           | 0.15          | mM | Ssa408            | 0.3           | mM |
| One_u9            | 0.4           | mM | CA060177          | 0.8           | mM | Ssa197            | 0.125         | mM |
| CA048828          | 0.4           | mM | Ssa197            | 0.2           | mM | Exon2-Vic         | 0.05          | mM |
|                   |               |    |                   |               |    | Exon4-Vic         | 0.05          | mM |

| B                                                                                  |                                                                                   |
|------------------------------------------------------------------------------------|-----------------------------------------------------------------------------------|
| Multiplexes 1 & 2                                                                  | Multiplex 3                                                                       |
| 95°C 15min                                                                         | 94°C 5min                                                                         |
| <div>95°C 45sec<br/>55°C 1min30sec<br/>72°C 1min</div> <div>}</div> <div>x5</div>  | <div>94°C 45sec<br/>55°C 1min30sec<br/>72°C 1min</div> <div>}</div> <div>x3</div> |
| <div>95°C 45sec<br/>57°C 1min30sec<br/>72°C 1min</div> <div>}</div> <div>x22</div> | <div>94°C 1min<br/>57°C 1min30sec<br/>72°C 1min</div> <div>}</div> <div>x25</div> |
| 60°C 30min                                                                         | 72°C 10min                                                                        |
| 4°C ∞                                                                              | 4°C ∞                                                                             |

**Appendix 2.** Sea trout returning to the river Guddal several times over the study period. Recaptures indicated for 2017 are based on PIT tags only as no genotypes were available at this time. **A:** Females. **B:** Males.

[illegible]

B

[illegible]

**Appendix 3.** Proportion of anadromous trout ascending the river Guddal according to the week number between 2006 and 2017. Individuals from 2017 were not genotyped, so the data might contain some Atlantic salmon as well as individuals that ascended multiple times. Week 20 is mid-May, week 45 beginning of November.

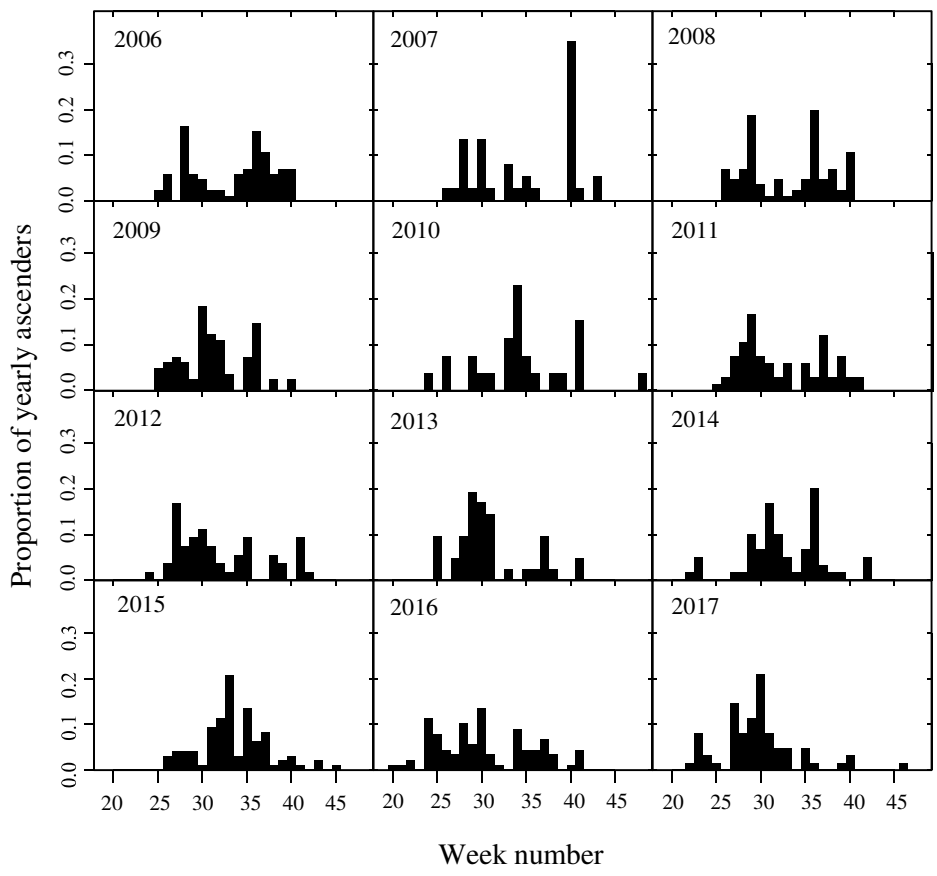

Supplement: Supplementary file 1 [file 3c762f37e4114b0bd672135d.pdf]
